# Supplementary material
Source: Springer Nature journal article supplement (https://www.springermedizin.de/resource/supplementary/12943_2009_454_MOESM2_ESM.pdf/9554298)

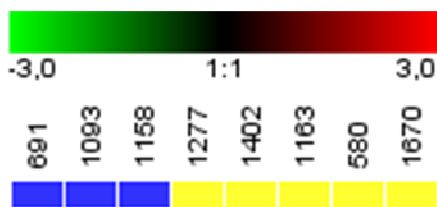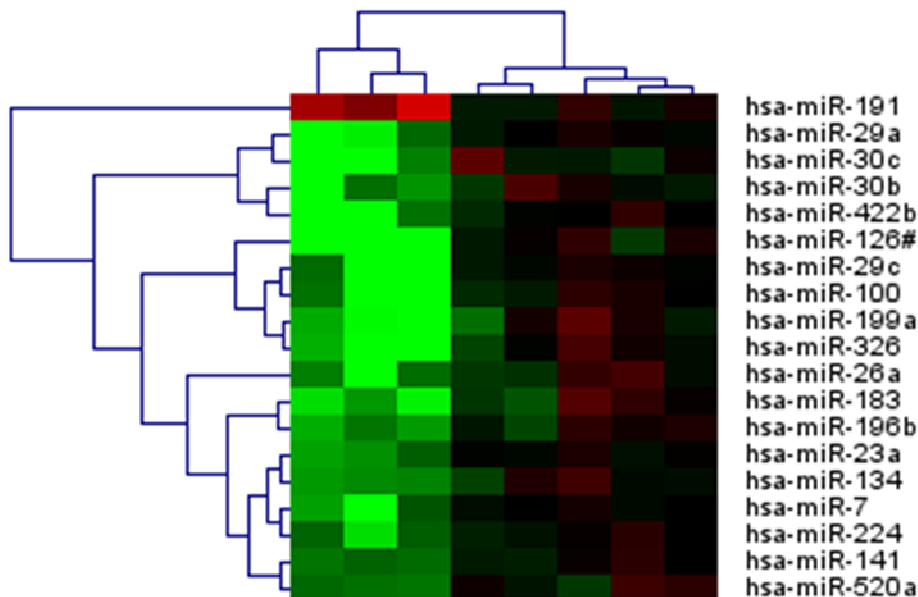

 Responder  
 Resistant

Supplement: MOESM2 [file 9554298]
